# Supplementary material for: Oxidase-mimicking activity of perovskite LaMnO3+δ nanofibers and their application for colorimetric sensing
Source: Royal Society of Chemistry journal article supplement (doi:10.1039/c8tb01706a), 2018-01-01
Supplement: c8tb01706a1.pdf [file c8tb01706a1.pdf]

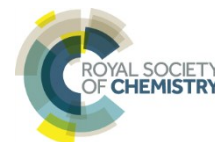

PAPER

## Oxidase-mimicking activity of perovskite $\text{LaMnO}_{3+\delta}$ nanofibers and their application for colorimetric sensing

Lifei Song, Yun Zhu, Zezhou Yang, Ce Wang, Xiaofeng Lu\*

Received 00th January 20xx,  
Accepted 00th January 20xx

DOI: 10.1039/x0xx00000x

[www.rsc.org/](http://www.rsc.org/)

Alan G. MacDiarmid Institute, College of Chemistry, Jilin University, Changchun, 130012, P. R. China

**Corresponding Author:** [xflu@jlu.edu.cn](mailto:xflu@jlu.edu.cn)

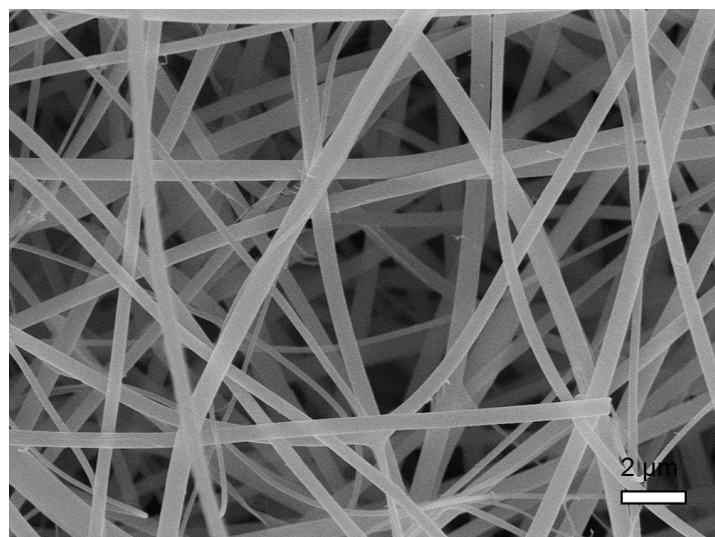

Fig. S1. SEM image of the electrospun PVP/La(NO<sub>3</sub>)<sub>3</sub>/Mn(Ac)<sub>2</sub> nanofibers.

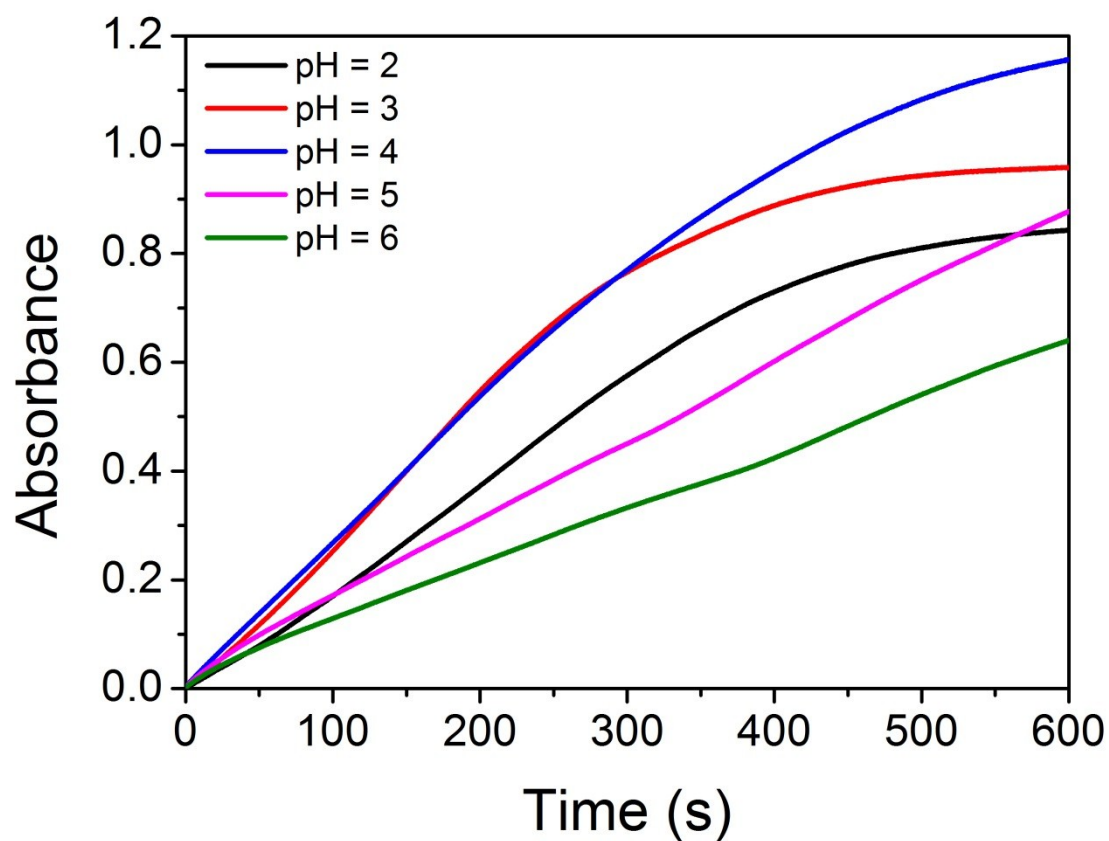

Fig. S2. The oxidase-like catalytic activity of the catalyst in acetate buffer solution with diverse pH values.

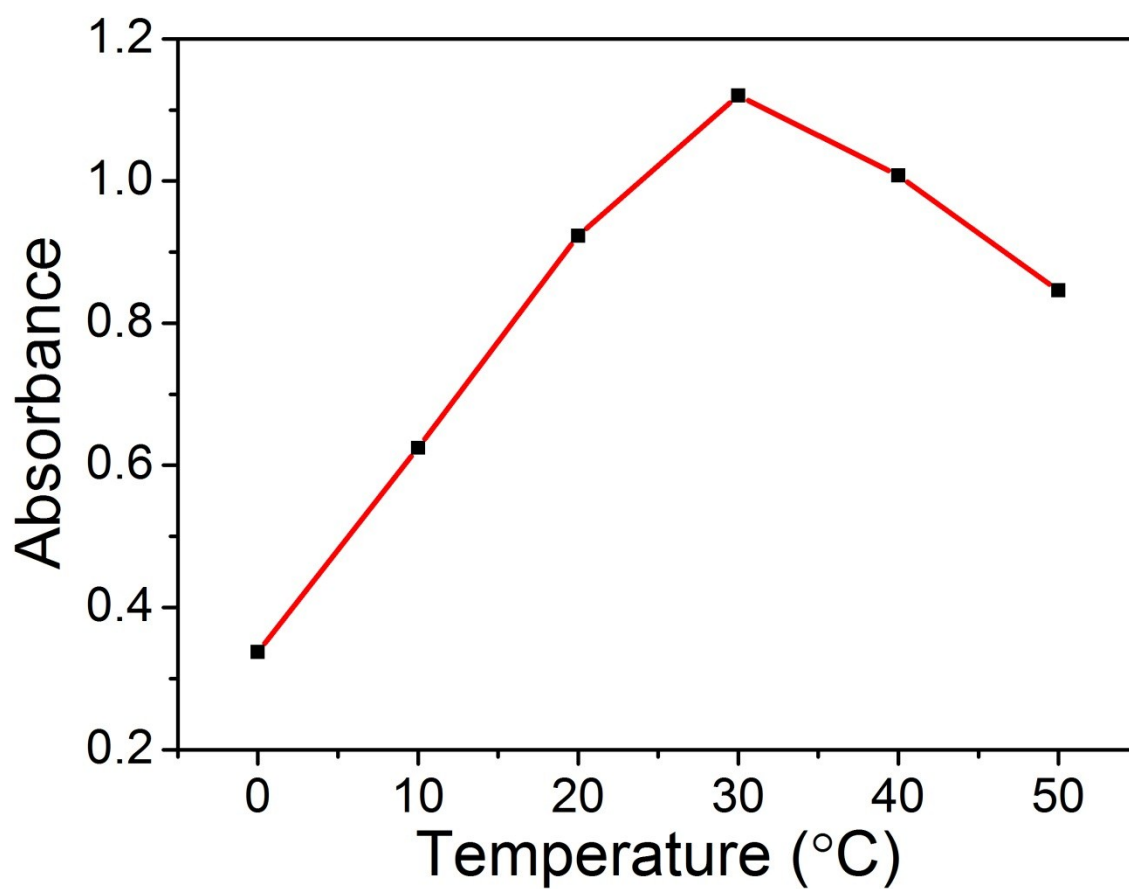

Fig. S3. Dependence of the oxidase-like activity of perovskite  $\text{LaMnO}_{3+\delta}$  nanofibers on the temperature.

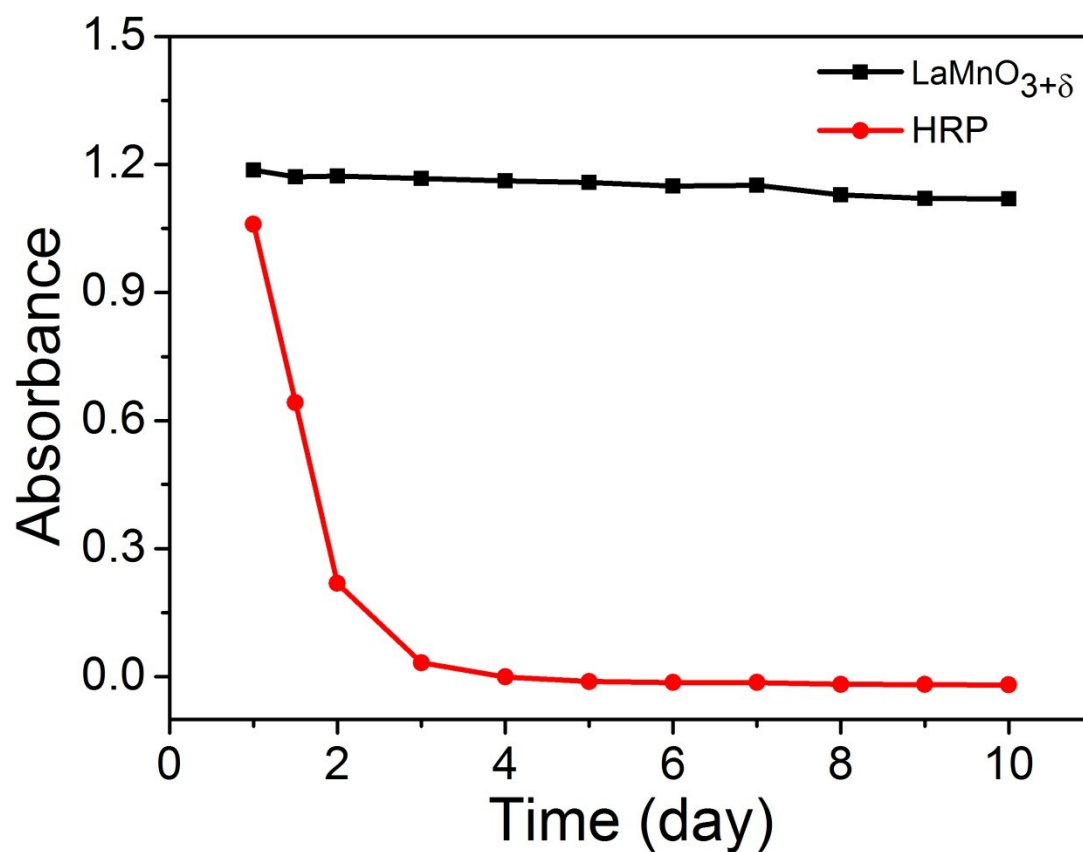

Fig. S4. Long-term stability of LaMnO<sub>3+δ</sub> nanofibers and HRP for enzyme mimicking. The upper system contains 20  $\mu\text{g}/\text{mL}$  of LaMnO<sub>3+δ</sub> nanofibers and 0.1 mM TMB in an acetate buffer solution (pH = 4) and the bottom system contains 40 ng/mL of HRP, 0.1 mM TMB and 65 mM H<sub>2</sub>O<sub>2</sub> in an acetate buffer solution (pH = 4).

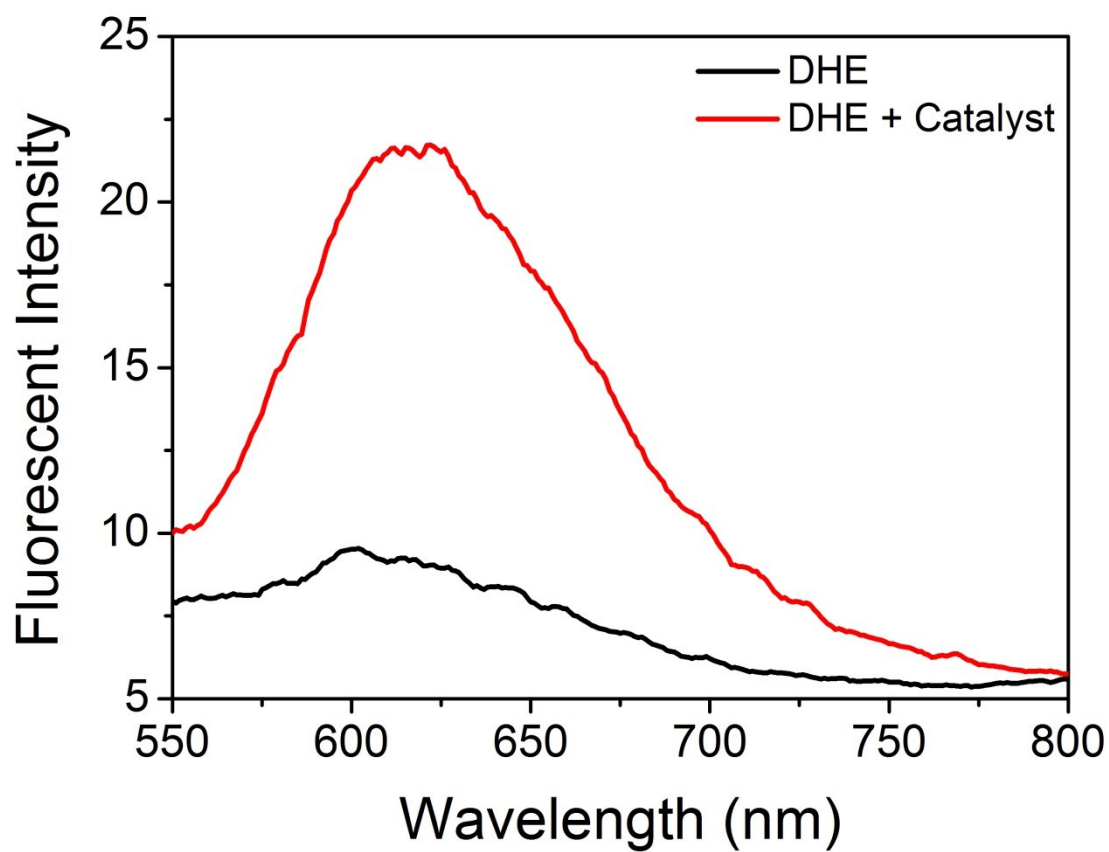

Fig. S5. The fluorescent spectrum of the specific detection of ROS using DHE as fluorescence probes.  $\lambda_{\text{ex}} = 500$  nm.

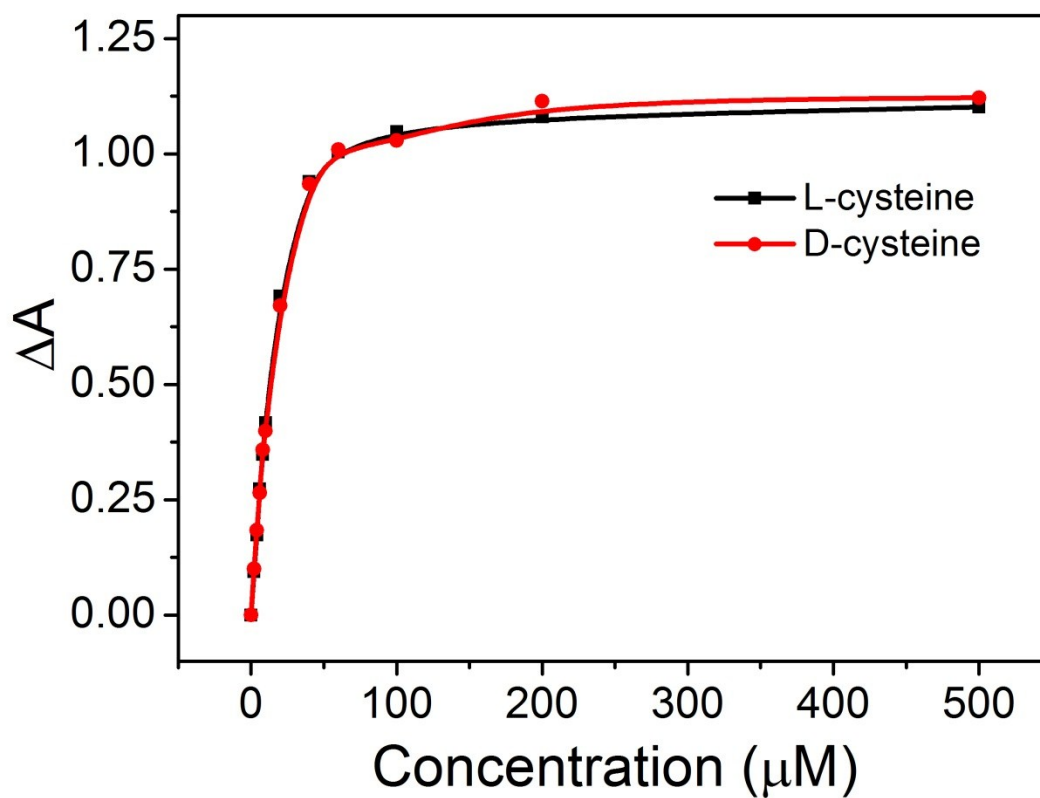

Fig. S6. Comparison of the absorbance evolution at 651 nm of the oxidation of TMB after 10 min with the existence of L-cysteine or D-cysteine at different concentrations.

Table S1. Determination of L-cysteine concentration in the serum sample.

| Serum sample<br>(150-folds<br>diluted) | Without<br>spiking<br>( $\mu\text{M}$ ) $\pm$ SD<br>(n=3) | L-cysteine<br>spiking ( $\mu\text{M}$ ) | Inhibitor measured<br>( $\mu\text{M}$ ) $\pm$ SD (n=3) | Recovery (%) |
|----------------------------------------|-----------------------------------------------------------|-----------------------------------------|--------------------------------------------------------|--------------|
|                                        |                                                           | 4                                       | 8.209 $\pm$ 0.057                                      | 101.3        |
| Sample                                 | 4.155 $\pm$ 0.236                                         | 6                                       | 10.047 $\pm$ 0.237                                     | 98.2         |
|                                        |                                                           | 8                                       | 12.171 $\pm$ 0.258                                     | 100.2        |
